# Supplementary material for: Screening of Heteroaromatic Scaffolds against Cystathionine Beta-Synthase Enables Identification of Substituted Pyrazolo[3,4-c]Pyridines as Potent and Selective Orthosteric Inhibitors
Source: MDPI journal article supplement (doi:10.3390/molecules25163739), 2020-08-16
Supplement: s1 [file s1]

# Screening of heteroaromatic scaffolds against Cystathionine beta-synthase enables identification of substituted pyrazolo[3,4-c]pyridines as potent and selective orthosteric inhibitors

Anna-Maria Fantel<sup>1</sup>, Vassilios Myrianthopoulos<sup>1</sup>, Anastasios Georgoulis<sup>2</sup>, Nikolaos Lougiakis<sup>1</sup>, Iliana Zantza<sup>1</sup>, George Lambrinidis<sup>1</sup>, Fiona Augsburger<sup>3</sup>, Panagiotis Marakos<sup>1</sup>, Costantinos E. Vorgias<sup>2</sup>, Csaba Szabo<sup>3</sup>, Nicole Pouli<sup>1</sup>, Andreas Papapetropoulos<sup>1</sup> and Emmanuel Mikros<sup>1,4\*</sup>

<sup>1</sup> Department of Pharmacy, National and Kapodistrian University of Athens, Athens, Greece; anmafantel@pharm.uoa.gr; vmyriant@pharm.uoa.gr; nlougiak@pharm.uoa.gr; izantza@pharm.uoa.gr; lambrinidis@pharm.uoa.gr; marakos@pharm.uoa.gr; pouli@pharm.uoa.gr; apapapet@pharm.uoa.gr; mikros@pharm.uoa.gr

<sup>2</sup> Department of Biology, National and Kapodistrian University of Athens, Athens, Greece; tgeorgoulis@med.uoa.gr; cvorgias@biol.uoa.gr

<sup>3</sup> Chair of Pharmacology, Section of Medicine, University of Fribourg, Fribourg, Switzerland; fiona.augsburger@unifr.ch; csaba.szabo@unifr.ch

<sup>4</sup> PharmaInformatics Unit, "Athena" Research and Innovation Center; Athens, Greece; mikros@pharm.uoa.gr

\* Correspondence: mikros@pharm.uoa.gr; Tel.: +30 2107274813

## SUPPLEMENTARY MATERIAL

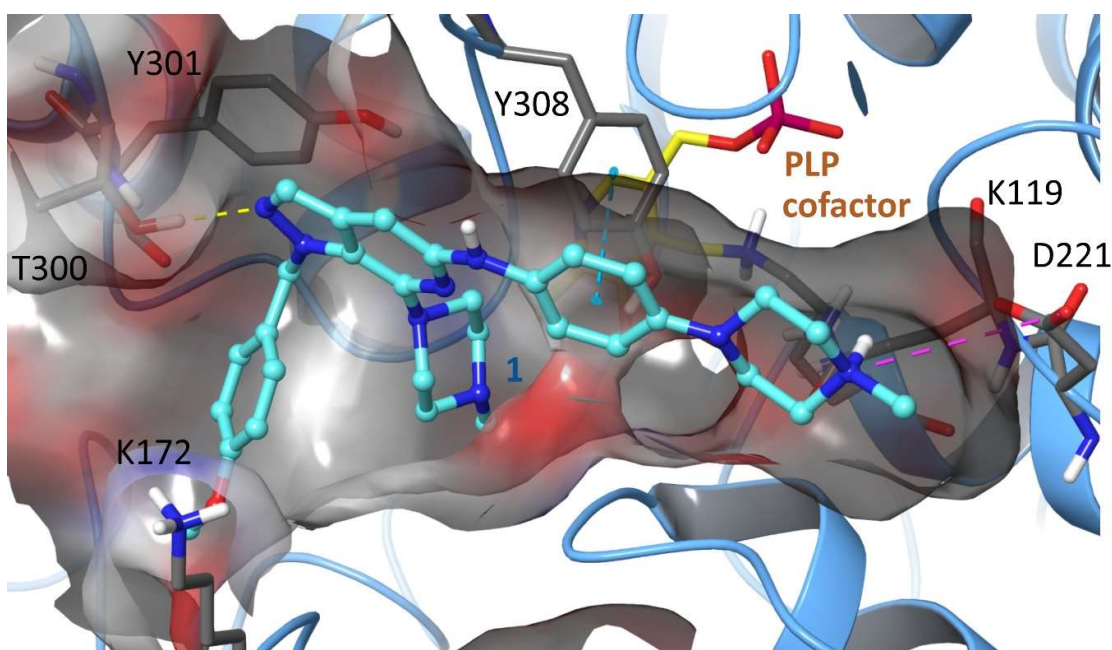

**Figure S1.** The dominant binding geometry of the protonated **1** inside the CBS active site as determined by the induced-fit algorithm for docking calculations. The inhibitor is mainly anchored to the enzyme by a hydrogen bond depicted as a yellow dashed line between the side chain of Thr300 and the inhibitor pyrazole ring, whereas a salt bridge (magenta dashed line) is formed between the protonated N4 of piperazine and the side chain of Asp221. A stacking interaction between the phenylamino ring of **1** and Tyr308 (shown as blue dashed line) further stabilizes the complex. The protein is depicted as a blue ribbon and molecular surface colored according to the electrostatic potential (red: negative; blue: positive).
